# Supplementary material
Source: publisher site journal article supplement (https://www.dovepress.com/article/399658)
Supplement: Supplementary file 1 [file get_supplementary_file.php]

**Supplemental Table 1. Condition-Specific Measures of HRQOL Mapped to Areas of Impact**

|  | **Functional Assessment of Cancer Therapy– General (FACT-G)** | **European Organization for Research and Treatment Quality of Life Questionnaire – Core 30**  **(EORTC QLQ-C30)** | **Patient-Generated Subjective Global Assessment** | **Comprehensive Cancer Network Distress Thermometer** | **Kansas City Cardiomyopathy Questionnaire-12**  **(KCCQ-12)** | **Hematology Patient Reported Symptom Screen (HPRSS)** |
| --- | --- | --- | --- | --- | --- | --- |
| **General Health** |  | x |  |  |  |  |
| **Physical Functioning and Daily Activities** |  |  |  |  |  |  |
| Activities of daily living |  | x | x | x | x |  |
| Household activities/chores |  |  |  |  | x |  |
| Physical functioning/mobility |  | x |  |  | x |  |
| Reduction in physical strength |  |  |  |  |  |  |
| Difficulty walking |  | x |  |  | x |  |
| Leisure activities/exercise/hobbies | x | x |  |  | x |  |
| Work limitations | x | x |  | x | x |  |
| **Social Functioning** |  |  |  |  |  |  |
| Social functioning |  | x |  |  | x |  |
| Burden on family |  |  |  |  |  |  |
| Family roles | x | x |  |  |  |  |
| Difficulty sustaining social interaction with family |  | x |  |  | x |  |
| Negatively impacts relationship with spouse | x |  |  | x |  |  |
| Travel |  |  |  |  |  |  |
| **Emotional Well-Being** |  |  |  |  |  |  |
| Mental/emotional health | x | x |  | x |  |  |
| Nervousness/anxiety | x |  |  | x |  |  |
| Sadness/depression | x | x |  | x |  |  |
| Worry |  | x |  | x |  |  |
| Fear |  |  |  | x |  |  |
| Anger |  |  |  |  |  |  |
| Frustration |  |  |  |  |  |  |
| Increased stress |  |  |  |  |  |  |
| Difficulty accepting and coping | x |  |  |  |  |  |
| Decreased motivation |  |  |  | x |  |  |
| Decreased attractiveness |  |  |  |  |  |  |
| Poor self-esteem |  |  |  | x |  |  |
| Cognition |  | x |  | x |  |  |
| **Other Impacts** |  |  |  |  |  |  |
| Loss of balance |  |  |  |  |  |  |
| Sleep (disruption/need more) | x | x |  | x |  |  |
| Appetite/food restrictions |  | x | x |  |  |  |
| Altered taste in food |  |  | x |  |  |  |
| **Symptoms Often Evaluated in HRQOL PROs** |  |  |  |  |  |  |
| Pain | x | x | x | x |  | x |
| Fatigue |  |  |  | x | x | x |

**Supplemental Table 2. Mental Health Measures Mapped to Areas of Impact**

|  | **State-Trait Anxiety Inventory (STAI-Y)** | **Centre for Epidemiological Study–Depression Scale**  **(CES-D)** | **Coping Strategy Indicator (CSI)** | **General Health Questionnaire (GHQ-12)** | **Satisfaction with Life Scale (SWLS)** |
| --- | --- | --- | --- | --- | --- |
| **General Health** |  |  |  |  |  |
| **Physical Functioning and Daily Activities** |  |  |  |  |  |
| Activities of daily living |  |  |  | x |  |
| Household activities/chores |  |  |  |  |  |
| Physical functioning/mobility |  |  |  |  |  |
| Reduction in physical strength |  |  |  |  |  |
| Difficulty walking |  |  |  |  |  |
| Leisure activities/exercise/hobbies |  |  |  |  |  |
| Work limitations |  |  |  |  |  |
| **Social Functioning** |  |  |  |  |  |
| Social functioning |  |  | x |  |  |
| Burden on family |  |  |  |  |  |
| Family roles |  |  |  |  |  |
| Difficulty sustaining social interaction with family |  |  |  |  |  |
| Negatively impacts relationship with spouse |  |  |  |  |  |
| Travel |  |  |  |  |  |
| **Emotional Well-Being** |  |  |  |  |  |
| Mental/emotional health | x |  |  |  |  |
| Nervousness/anxiety | x |  |  |  |  |
| Sadness/depression |  | x |  | x |  |
| Worry | x |  |  | x |  |
| Fear | x | x |  |  |  |
| Anger | x |  |  |  |  |
| Frustration | x |  |  |  |  |
| Increased stress | x |  |  |  |  |
| Difficulty accepting and coping |  | x | x | x |  |
| Decreased motivation |  | x |  |  |  |
| Decreased attractiveness |  |  |  |  |  |
| Poor self-esteem | x | x |  | x |  |
| Cognition |  |  |  |  |  |
| **Other Impacts** |  |  |  |  |  |
| Loss of balance |  |  |  |  |  |
| Sleep (disruption/need more) |  | x | x | x |  |
| Appetite/food restrictions |  | x |  |  |  |
| Altered taste in food |  |  |  |  |  |
| **Symptoms Often Evaluated in HRQOL PROs** |  |  |  |  |  |
| Pain |  |  |  |  |  |
| Fatigue |  |  |  |  |  |

**Supplemental Table 3. Symptom-Specific and Miscellaneous Measures Mapped to Areas of Impact**

|  | **PROMIS Fatigue 8a** | **Epworth Sleepiness Score (ESS)** | **STOP-Bang for Obstructive Sleep Apnea (OSA)** | **Voice Handicap Index** | **Work Productivity and Activity Impairment questionnaire (WPAI)** |
| --- | --- | --- | --- | --- | --- |
| **General Health** |  |  |  |  |  |
| **Physical Functioning and Daily Activities** |  |  |  |  |  |
| Activities of daily living |  |  |  | x |  |
| Household activities/chores |  |  |  |  |  |
| Physical functioning/mobility |  |  |  | x |  |
| Reduction in physical strength |  |  |  |  |  |
| Difficulty walking |  |  |  |  |  |
| Leisure activities/exercise/hobbies |  |  |  |  |  |
| Work limitations |  |  |  | x | x |
| **Social Functioning** |  |  |  |  |  |
| Social functioning |  |  |  | x |  |
| Burden on family |  |  |  |  |  |
| Family roles |  |  |  |  |  |
| Difficulty sustaining social interaction with family |  |  |  | x |  |
| Negatively impacts relationship with spouse |  |  |  |  |  |
| Travel |  |  |  |  |  |
| **Emotional Well-Being** |  |  |  |  |  |
| Mental/emotional health |  |  |  |  |  |
| Nervousness/anxiety |  |  |  |  |  |
| Sadness/depression |  |  |  |  |  |
| Worry |  |  |  |  |  |
| Fear |  |  |  |  |  |
| Anger |  |  |  | x |  |
| Frustration |  |  |  | x |  |
| Increased stress |  |  |  |  |  |
| Difficulty accepting and coping |  |  |  |  |  |
| Decreased motivation |  |  |  |  |  |
| Decreased attractiveness |  |  |  |  |  |
| Poor self-esteem |  |  |  | x |  |
| Cognition |  |  |  |  |  |
| **Other Impacts** |  |  |  |  |  |
| Loss of balance |  |  |  |  |  |
| Sleep (disruption/need more) |  | x | x |  |  |
| Appetite/food restrictions |  |  |  |  |  |
| Altered taste in food |  |  |  |  |  |
| **Symptoms Often Evaluated in HRQoL PROs** |  |  |  |  |  |
| Pain |  |  |  |  |  |
| Fatigue | x |  | x |  |  |
